# Supplementary material for: Supercell convective environments in Spain based on ERA5: hail and non-hail differences
Source: Copernicus journal article supplement (doi:10.5194/wcd-3-1021-2022), 2022-09-05
Supplement: Supplementary file 1 [file wcd-3-1021-2022-supplement.pdf]

Supplement of Weather Clim. Dynam., 3, 1021–1036, 2022  
<https://doi.org/10.5194/wcd-3-1021-2022-supplement>  
© Author(s) 2022. CC BY 4.0 License.

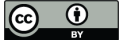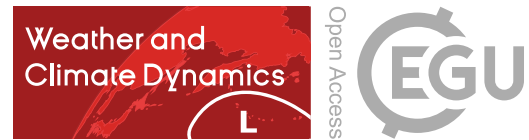

*Supplement of*

## **Supercell convective environments in Spain based on ERA5: hail and non-hail differences**

**Carlos Calvo-Sancho et al.**

*Correspondence to:* Carlos Calvo-Sancho ([carlos.calvo.sancho@uva.es](mailto:carlos.calvo.sancho@uva.es))

The copyright of individual parts of the supplement might differ from the article licence.

## Supplement

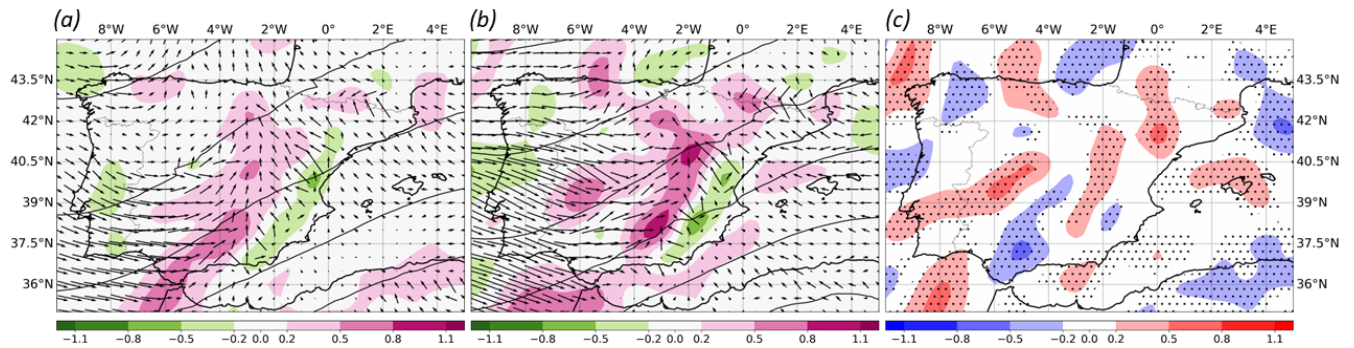

**Figure S1.** 700-400 hPa Q-vector divergence values (contours, Pa-1 s-3) and convergence of Q-vectors (arrows) composites at  $t_0$ , for (a) SP-NONHAIL, (b) SP-HAIL and (c) Differences between SP-HAIL and SP-NONHAIL. Black points in plot c) denote statistically significant differences ( $p$ -value < 0.05) in Q-vector divergence values.

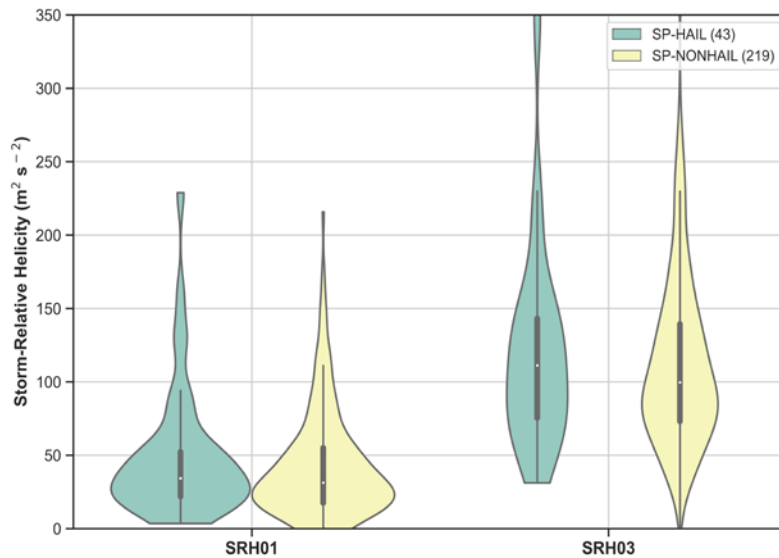

**Figure S2.** SRH01 and SRH03 distributions and boxplots for SP-HAIL and SP-NONHAIL at  $t_0$ . The median is represented as a red point.
